# Supplementary material
Source: PubMed Central journal article supplement (PMC3608455)
Supplement: supp_112.050294_DMD050294Revised_Supplementary_Material.pdf [file supp_112.050294_DMD050294Revised_Supplementary_Material.pdf]

**Drug Metabolism and Disposition**

**Application of a physiologically-based pharmacokinetic model to assess propofol hepatic and renal glucuronidation in isolation; utility of in vitro and in vivo data – Supplementary Material**

Katherine L Gill, Michael Gertz, J Brian Houston and Aleksandra Galetin

**Supplemental Table 1: Organ weight, blood flow and tissue to plasma partition coefficients used in a whole body PBPK model for prediction of propofol in vivo clearance and blood concentration-time profiles from in vitro metabolism data**

| <b>Tissue</b> | <b>Mass <sup>a</sup><br/>(% total body weight)</b> | <b>Blood Flow <sup>a</sup><br/>(% total cardiac output)</b> | <b>Tissue to Plasma<br/>Partition Coefficient <sup>b</sup></b> |
|---------------|----------------------------------------------------|-------------------------------------------------------------|----------------------------------------------------------------|
| Adipose       | 20                                                 | 5.0                                                         | 9.29                                                           |
| Brain         | 2.0                                                | 12                                                          | 6.47                                                           |
| Enterocyte    | 0.13                                               | 4.6                                                         | 5.18                                                           |
| Gut           | 0.76                                               | 5.4                                                         | 5.18                                                           |
| Heart         | 0.46                                               | 4.0                                                         | 1.66                                                           |
| Kidney        | 0.43                                               | 19                                                          | 2.51                                                           |
| Liver         | 2.5                                                | 26                                                          | 3.12                                                           |
| Lung          | 0.69                                               | 100                                                         | 0.68                                                           |
| Muscle        | 40                                                 | 17                                                          | 2.63                                                           |
| Pancreas      | 0.19                                               | 1.0                                                         | 4.12                                                           |
| Bone          | 15                                                 | 5.0                                                         | 7.10                                                           |
| Skin          | 4.6                                                | 5.0                                                         | 3.17                                                           |

|                 |      |     |      |
|-----------------|------|-----|------|
| Spleen          | 0.21 | 3.0 | 2.53 |
| Stomach         | 0.21 | 1.0 | 5.18 |
| Large Intestine | 0.51 | 4.0 | 5.18 |
| Arterial Blood  | 2.6  | -   | -    |
| Venous Blood    | 5.2  | -   | -    |

<sup>a</sup> Remaining body mass and blood flow were accounted for in a 'rest of body' compartment.  $K_p$  for the 'rest of body' compartment was assumed to be the same as muscle.

<sup>b</sup> predicted using the Rodgers and Rowland method and normalised for observed  $V_{ss}$  by a uniform scalar (Scaling factor for volume =  $\frac{V_{ss,obs} - \text{blood volume}}{V_{ss,pred} - \text{blood volume}}$ )

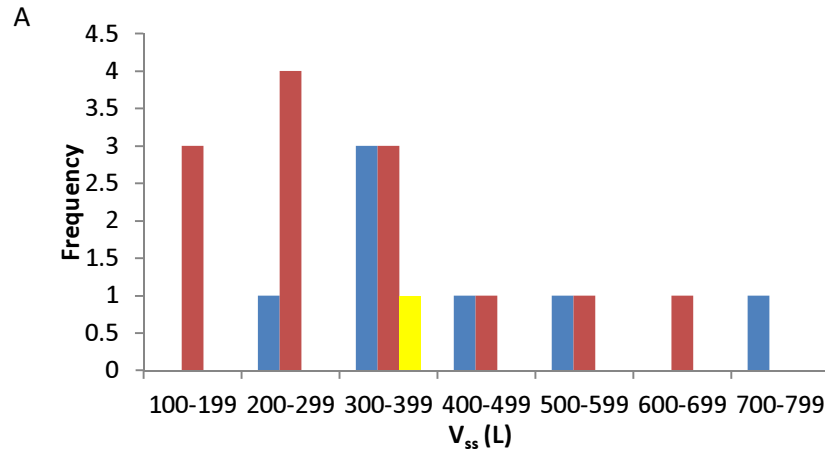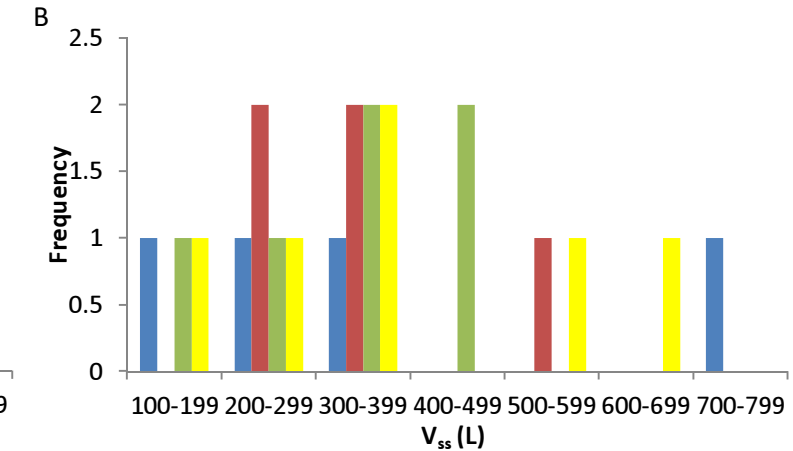

C

D

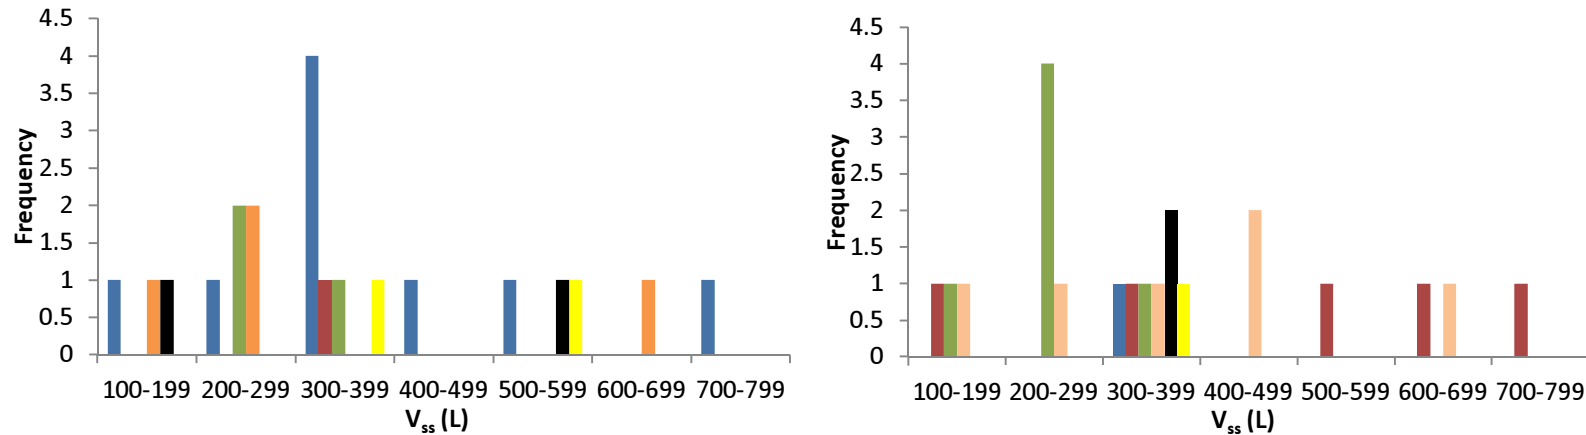

**Supplemental Figure 1: Frequency of mean reported propofol  $V_{ss}$  values within the literature.** A: comparisons based on dose type; ■, ■ and ■ represent bolus, infusion or unknown dosing, respectively. B: comparisons based on gender; ■, ■, ■ and ■ represent males, females, mixed or unknown gender, respectively. C: comparisons based on dose level; ■, ■, ■, ■ and ■ represent doses of 0-5, 5-10, 10-15, 15-20, 20-22 mg/kg or unknown dose, respectively. D: comparisons based on age; ■, ■, ■, ■ and ■ represent mean population age of 20-30, 30-40, 40-50, 50-60, 60-70 years or unknown age, respectively. Data collected from the following studies (Gepts et al., 1987; Servin et al., 1988a; Servin et al., 1988b; Simons et al., 1988; Gill et al., 1990; Servin et al., 1990; Gin et al., 1991; Servin et al., 1993; Wessén et al., 1994; Frenkel et al., 1995; Doenicke et al., 1997; Knibbe et al., 2000; Servin et al., 2003; Obach et al., 2008).

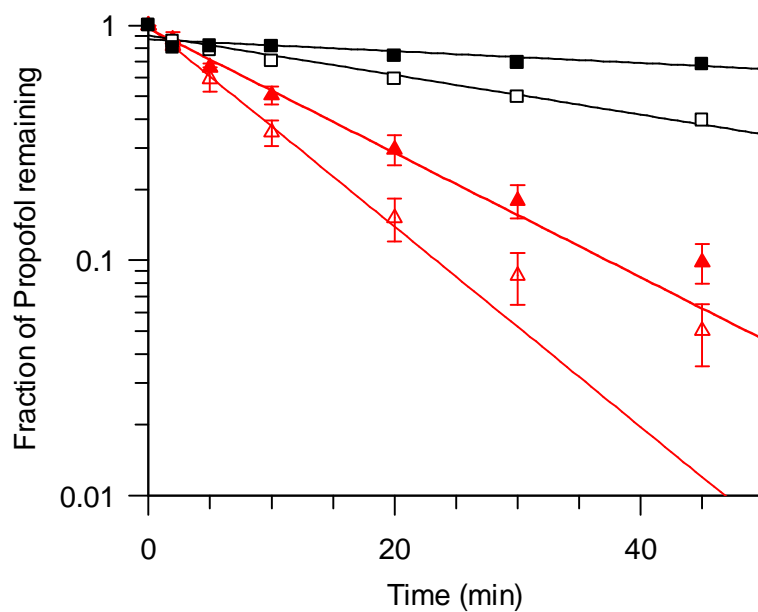

**Supplemental Figure 2: Mean fraction of propofol remaining  $\pm$  SD over time in human hepatic microsomes in the presence and absence of cytochrome P450 cofactors and 2% bovine serum albumin.** Open and closed symbols represent depletion in the absence and presence of 2% BSA, respectively. Red triangles represent depletion in human hepatic microsomes in the presence of cytochrome P450 cofactors. Black squares represent non-enzymatic loss of propofol in human hepatic microsomes in the absence of cytochrome P450 cofactors.

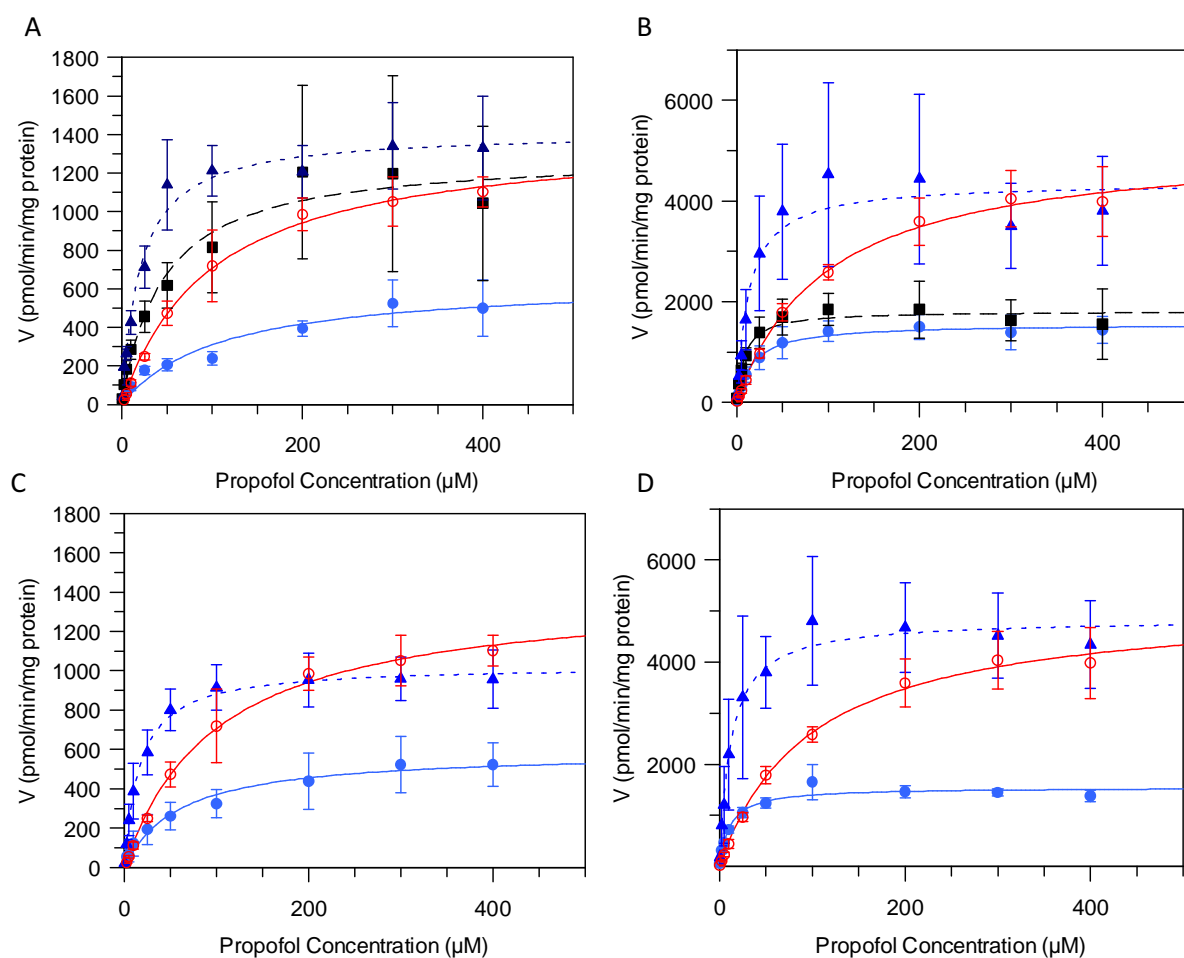

**Supplemental Figure 3: Effect of 1 or 2% BSA on propofol glucuronide formation in human hepatic and renal microsomes at different microsomal protein concentrations.** A and B: Effect of 2% BSA on propofol glucuronide formation in human hepatic and renal microsomes, respectively; C and D: Effect of 1% BSA on propofol glucuronide formation in human hepatic and renal microsomes, respectively. ○ represents propofol glucuronide formation in the absence of BSA; ●, ■ and ▲ represent propofol glucuronide formation in the presence of BSA at microsomal protein concentrations of 0.05, 0.075 and 0.1 mg/ml, respectively. Data represent the mean of three experiments, each performed in duplicate. Error bars represent the standard deviation.

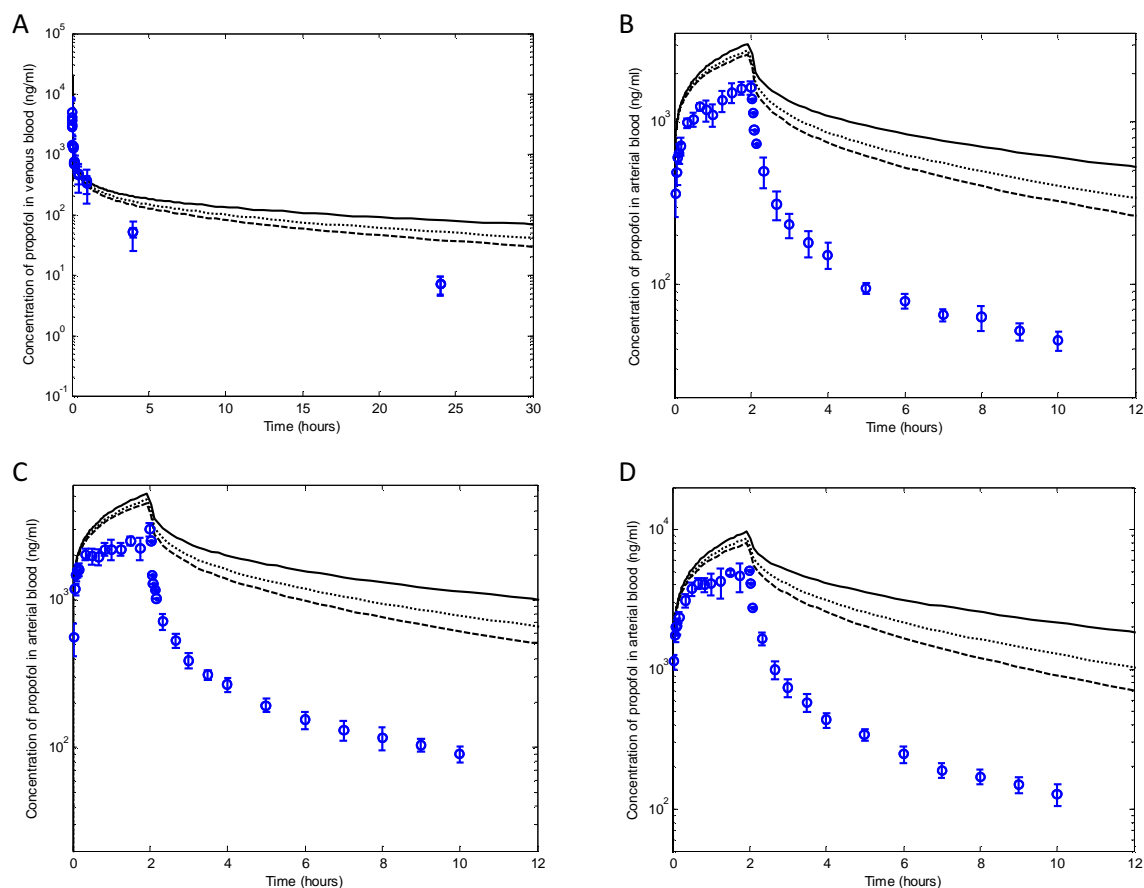

**Supplemental Figure 4: Propofol blood concentration-time profiles predicted using in vitro  $CL_{int}$  from the substrate depletion method in microsomes with/without hepatocyte  $CL_{int}$  data.**

A: Data from Doenicke et al (1987); B: Data from 6 mg/kg dose level from Gepts et al (1987); C: Data from 12 mg/kg dose level from Gepts et al (1987); D: Data from 18 mg/kg dose level from Gepts et al (1987).  $\circ$  represent mean observed data  $\pm$  SD; solid line represents predicted concentrations using in vitro  $CL_{int}$  data from microsomal assays in the absence of BSA; dashed line represents predicted concentrations using in vitro  $CL_{int}$  data from microsomal assays in the presence of BSA; dotted line represents predicted concentrations using in vitro  $CL_{int}$  data from microsomal assays in the presence of BSA for kidney and intestine and hepatocyte  $CL_{int}$  data for liver.

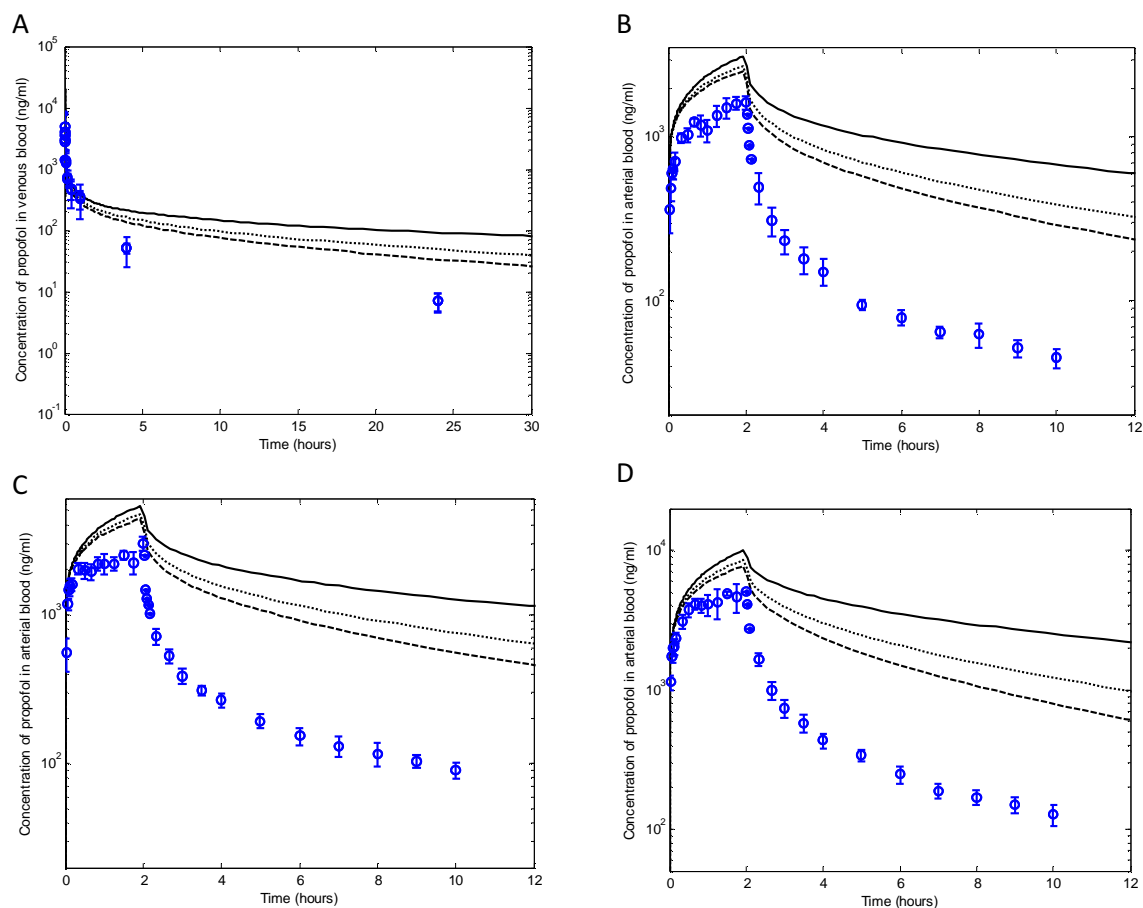

**Supplemental Figure 5: Propofol blood concentration-time profiles predicted using in vitro  $CL_{int,UGT}$  from the metabolite formation method in microsomes,  $CL_{int,CYP}$  data from substrate depletion assays in microsomes with/without hepatocyte  $CL_{int}$  data.** A: Data from Doenicke et al (1987); B: Data from 6 mg/kg dose level from Gepts et al (1987); C: Data from 12 mg/kg dose level from Gepts et al (1987); D: Data from 18 mg/kg dose level from Gepts et al (1987).  $\circ$  represent mean observed data  $\pm$  SD; solid line represents predicted concentrations using in vitro  $CL_{int,UGT}$  data from microsomal assays in the absence of BSA; dashed line represents predicted concentrations using in vitro  $CL_{int,UGT}$  data from microsomal assays in the presence of BSA; dotted line represents predicted concentrations using in vitro  $CL_{int,UGT}$  data from microsomal assays in the presence of BSA for kidney and intestine and hepatocyte  $CL_{int}$  data for the liver.



**Supplemental Table 2: Prediction accuracy for propofol in vivo clearance (CL) for individual dose groups using CL<sub>int</sub> data derived from different in vitro systems**

| Clinical data source              | In vivo CL (L/h) | In vitro method used to derive CL <sub>int,UGT</sub> | Predicted CL (L/h)     |                     |                                    | Predicted CL / Observed CL (%) |                     |                                    |
|-----------------------------------|------------------|------------------------------------------------------|------------------------|---------------------|------------------------------------|--------------------------------|---------------------|------------------------------------|
|                                   |                  |                                                      | In vitro system used   |                     |                                    | In vitro system used           |                     |                                    |
|                                   |                  |                                                      | Microsomes without BSA | Microsomes with BSA | Hepatocytes and HKM & HIM with BSA | Microsomes without BSA         | Microsomes with BSA | Hepatocytes and HKM & HIM with BSA |
| Doenicke et al (1997) Group 1 / 2 | 98.0 / 100       | Substrate depletion                                  | 18.7                   | 37.2                | 29.4                               | 19.1 / 18.7                    | 37.9 / 37.9         | 30.0 / 29.4                        |
|                                   |                  | Metabolite formation                                 | 15.7                   | 40.4                | 30.5                               | 16.1 / 15.7                    | 41.2 / 40.4         | 31.1 / 30.5 <sup>a</sup>           |
| Gepts et al (1987) 6 mg/kg dose   | 116              | Substrate depletion                                  | 17.4                   | 33.0                | 26.9                               | 15.1                           | 28.6                | 23.3                               |
|                                   |                  | Metabolite formation                                 | 14.8                   | 35.7                | 27.9                               | 12.8                           | 30.9                | 24.2 <sup>a</sup>                  |
| Gepts et al (1987) 12 mg/kg dose  | 114              | Substrate depletion                                  | 16.0                   | 31.3                | 30.0                               | 14.1                           | 27.6                | 26.4                               |
|                                   |                  | Metabolite formation                                 | 13.5                   | 34.0                | 26.0                               | 11.9                           | 29.9                | 22.9 <sup>a</sup>                  |
| Gepts et al (1987) 18 mg/kg dose  | 91.9             | Substrate depletion                                  | 15.6                   | 31.3                | 29.8                               | 17.0                           | 34.0                | 32.4                               |
|                                   |                  | Metabolite formation                                 | 13.1                   | 34.0                | 25.5                               | 14.3                           | 37.0                | 27.8 <sup>a</sup>                  |

<sup>a</sup> Substrate depletion approach used to determine hepatocyte CL<sub>int,u</sub> data.

**Supplemental Table 3: Comparison of propofol glucuronide  $K_m$ ,  $V_{max}$  and  $CL_{int,UGT}$  in human liver, kidney and intestinal microsomes to those from previously published studies**

| Parameter                                   | Source of data | HLM <sup>a</sup> | HKM <sup>b</sup> | HIM <sup>c</sup> | HLM <sup>d</sup> |
|---------------------------------------------|----------------|------------------|------------------|------------------|------------------|
|                                             |                | Without BSA      |                  |                  | With BSA         |
| $K_m$<br>( $\mu M$ )                        | Our data       | 107              | 91.0             | 458              | 5.22             |
|                                             | Published data | 17.3-338         | 81-384           | 150-239          | 7.8-15.5         |
| $V_{max}$<br>(pmol/min/mg protein)          | Our data       | 1460             | 5224             | 1280             | 1385             |
|                                             | Published data | 580-3900         | 5560-7970        | 1370-1610        | 780-1048         |
| $CL_{int,UGT}$<br>( $\mu L/min/mg$ protein) | Our data       | 14.9             | 57.5             | 2.82             | 266              |
|                                             | Published data | 8-41             | 20-67            | 6.7-9.1          | 68-100           |

<sup>a</sup> Kinetic data for HLM without BSA were collated from the following references: (Le Guellec et al., 1995; Raof et al., 1996; Soars et al., 2001; Soars et al., 2003; Al-Jahdari et al., 2006; Shimizu et al., 2007; Rowland et al., 2008; Liang et al., 2011; Walsky et al., 2012)

<sup>b</sup> Kinetic data for HKM without BSA were collated from the following references: (Raof et al., 1996; Soars et al., 2001; Al-Jahdari et al., 2006)

<sup>c</sup> Kinetic data for HIM without BSA were collated from the following references: (Raof et al., 1996; Shimizu et al., 2007)

<sup>d</sup> Kinetic data for HLM with BSA were collated from the following references: (Rowland et al., 2008; Walsky et al., 2012)

## References

- Al-Jahdari W, Yamamoto K, Hiraoka H, Nakamura K, Goto F, and Horiuchi R (2006) Prediction of total propofol clearance based on enzyme activities in microsomes from human kidney and liver. *Eur J Clin Pharmacol* **62**:527-533.
- Doenicke AW, Roizen MF, Rau J, O'Connor M, Kugler J, Klotz U, and Babl J (1997) Pharmacokinetics and pharmacodynamics of propofol in a new solvent. *Anesth Analg* **85**:1399-1403.
- Frenkel C, Schüttler J, Ihmsen H, Heye H, and Rommelsheim K (1995) Pharmacokinetics and pharmacodynamics of propofol/alfentanil infusions for sedation in ICU patients. *Intensive Care Med* **21**:981-988.
- Gepts EM, Camu FM, Cockshott IDP, and Douglas EJH (1987) Disposition of propofol administered as constant rate intravenous infusions in humans. *Anesth Analg* **66**:1256-1263.
- Gill SS, Wright EM, and Reilly CS (1990) Pharmacokinetic interaction of propofol and fentanyl: Single bolus injection study. *Br J Anaesth* **65**:760-765.
- Gin T, Yau G, Jong W, Tan P, Leung R KW, and Chan K (1991) Disposition of propofol at caesarean section and in the postpartum period. *Br J Anaesth* **67**:49-53.
- Knibbe CAJ, Aarts LPHJ, Kuks PFM, Voortman HJ, Lie-A-Huen L, Bras LJ, and Danhof M (2000) Pharmacokinetics and pharmacodynamics of propofol 6% SAZN versus propofol 1% SAZN and Diprivan-10 for short-term sedation following coronary artery bypass surgery. *Eur J Clin Pharmacol* **56**:89-95.
- Le Guellec C, Lacarelle B, Villard PH, Point H, Catalin J, and Durand A (1995) Glucuronidation of propofol in microsomal fractions from various tissues and species including humans: Effect of different drugs. *Anesth Analg* **81**:855-861.
- Liang S-C, Ge G-B, Liu H-X, Shang H-T, Wei H, Fang Z-Z, Zhu L-L, Mao Y-X, and Yang L (2011) Determination of propofol UDP-glucuronosyltransferase (UGT) activities in hepatic microsomes from different species by UFLC-ESI-MS. *J Pharm Biomed Anal* **54**:236-241.
- Obach RS, Lombardo F, and Waters NJ (2008) Trend analysis of a database of intravenous pharmacokinetic parameters in humans for 670 drug compounds. *Drug Metab Dispos* **36**:1385-1405.
- Raouf AA, van Obbergh LJ, de Ville de Goyet J, and Verbeeck RK (1996) Extrahepatic glucuronidation of propofol in man: Possible contribution of gut wall and kidney. *Eur J Clin Pharmacol* **50**:91-96.

Rowland A, Knights KM, Mackenzie PI, and Miners JO (2008) The "albumin effect" and drug glucuronidation: Bovine serum albumin and fatty acid-free human serum albumin enhance the glucuronidation of UDP-glucuronosyltransferase (UGT) 1A9 substrates but not UGT1A1 and UGT1A6 activities. *Drug Metab Dispos* **36**:1056-1062.

Servin F, Bougeois B, Gomeni R, Mentre F, Farinotti R, and Desmouts J-M (2003) Pharmacokinetics of propofol administered by target-controlled infusion to alcoholic patients. *Anesthesiology* **99**:576-585.

Servin F, Cockshott ID, Farinotti R, Haberer JP, Winckler C, and Desmouts JM (1990) Pharmacokinetics of propofol infusions in patients with cirrhosis. *Br J Anaesth* **65**:177-183.

Servin F, Desmouts JM, Farinotti R, Haberer JP, and Winckler C (1988a) Pharmacokinetics of propofol administered by continuous infusion in patients with cirrhosis. *Anaesthesia* **43**:23-24.

Servin F, Desmouts JM, Haberer JP, Cockshott ID, Plummer GF, and Farinotti R (1988b) Pharmacokinetics and protein binding of propofol in patients with cirrhosis. *Anesthesiology* **69**:887-891.

Servin F, Farinotti R, Haberer J-P, and Desmouts J-M (1993) Propofol infusion for maintenance of anesthesia in morbidly obese patients receiving nitrous oxide. A clinical and pharmacokinetic study. *Anesthesiology* **78**:657-665.

Shimizu M, Matsumoto Y, and Yamazaki H (2007) Effects of propofol analogs on glucuronidation of propofol, an anesthetic drug, by human liver microsomes. *Drug Metab Lett* **1**:77-79.

Simons PJ, Cockshott ID, Douglas EJ, Gordon EA, Hopkins K, and Rowland M (1988) Disposition in male volunteers of a subanaesthetic intravenous dose of an oil in water emulsion of <sup>14</sup>C-propofol. *Xenobiotica* **18**:429-440.

Soars MG, Riley RJ, Findlay KAB, Coffey MJ, and Burchell B (2001) Evidence for significant differences in microsomal drug glucuronidation by canine and human liver and kidney. *Drug Metab Dispos* **29**:121-126.

Soars MG, Ring BJ, and Wrighton SA (2003) The effect of incubation conditions on the enzyme kinetics of UDP-glucuronosyltransferases. *Drug Metab Dispos* **31**:762-767.

Walsky RL, Bauman JN, Bourcier K, Giddens G, Lapham K, Negahban A, Ryder TF, Obach RS, Hyland R, and Goosen TC (2012) Optimized assays for human UDP-glucuronosyltransferase (UGT) activities: Altered alamethicin concentration and utility to screen for UGT inhibitors. *Drug Metab Dispos* **40**:1051-1065.

Wessén A, Persson PM, Nilsson A, and Hartvig P (1994) Clinical pharmacokinetics of propofol given as a constant-rate infusion and in combination with epidural blockade. *J Clin Anesth* **6**:193-198.
